# Supplementary material for: Protocol for an observational study of delirium in the post-anaesthesia care unit (PACU) as a potential predictor of subsequent postoperative delirium
Source: PubMed Central journal article supplement — BMJ Open. 2017 Jul 10;7(7):e016402. doi: 10.1136/bmjopen-2017-016402 (PMC5541504; doi:10.1136/bmjopen-2017-016402), 2017-07-10
Supplement: bmjopen-2017-016402.draft_revisions.pdf [file bmjopen-2017-016402.draft_revisions.pdf]

# BMJ Open

## Protocol for an observational study of delirium in the Post-Anesthesia Care Unit (PACU) as a potential predictor of subsequent postoperative delirium

|                                 |                                                                                                                                                                                                                                                                                                                                         |
|---------------------------------|-----------------------------------------------------------------------------------------------------------------------------------------------------------------------------------------------------------------------------------------------------------------------------------------------------------------------------------------|
| Journal:                        | <i>BMJ Open</i>                                                                                                                                                                                                                                                                                                                         |
| Manuscript ID                   | bmjopen-2017-016402                                                                                                                                                                                                                                                                                                                     |
| Article Type:                   | Protocol                                                                                                                                                                                                                                                                                                                                |
| Date Submitted by the Author:   | 14-Feb-2017                                                                                                                                                                                                                                                                                                                             |
| Complete List of Authors:       | Cui, Victoria; Washington University School of Medicine, Anesthesiology<br>Tedeschi, Catherine; Washington University School of Medicine, Anesthesiology<br>Kronzer, Vanessa<br>McKinnon, Sherry; Washington University School of Medicine, Anesthesiology<br>Avidan, Michael; Washington University School of Medicine, Anesthesiology |
| <b>Primary Subject Heading</b>: | Anaesthesia                                                                                                                                                                                                                                                                                                                             |
| Secondary Subject Heading:      | Surgery                                                                                                                                                                                                                                                                                                                                 |
| Keywords:                       | Delirium & cognitive disorders < PSYCHIATRY, Adult intensive & critical care < ANAESTHETICS, GERIATRIC MEDICINE                                                                                                                                                                                                                         |
|                                 |                                                                                                                                                                                                                                                                                                                                         |

SCHOLARONE™  
Manuscripts

**Title**

Protocol for an observational study of delirium in the Post-Anesthesia Care Unit (PACU) as a potential predictor of subsequent postoperative delirium

**Authors**

Victoria Cui<sup>1</sup>, Catherine M. Tedeschi<sup>1</sup>, Vanessa L. Kronzer<sup>1</sup>, Sherry L. McKinnon<sup>1</sup>, Michael S. Avidan<sup>1\*</sup>

<sup>1</sup>Department of Anesthesia, Washington University School of Medicine, Saint Louis, MO, 63110, USA

\*To whom correspondence should be addressed:

Michael S. Avidan  
<avidanm@wustl.edu>  
Washington University School of Medicine  
Campus Box 8054  
660 South Euclid Avenue  
St. Louis, MO 63110

## Table of Contents

- I. Abstract
- II. Article summary
  - a. Strengths and limitations
- III. Introduction
  - a. Background and rationale
  - b. Specific aims
  - c. Significance
- IV. Methods and analysis
  - a. Study Design
    - i. Delirium assessment method
    - ii. Sample size
    - iii. Blinding
  - b. Study group and consenting process
    - i. Eligibility criteria
  - c. Data
    - i. Statistical considerations
  - d. Anticipated results
  - e. Strengths and Limitations
    - i. Strengths
    - ii. Limitations
  - f. Compliance
- V. Ethical considerations
  - a. Finance and insurance
  - b. Reporting and dissemination
- VI. References
- VII. Author contributions
- VIII. Collaborators
- IX. Funding information
- X. Data Sharing
- XI. Competing interests
- XII. Appendix A

1  
2  
3  
4  
5  
6  
7  
8  
9  
10  
11  
12  
13  
14  
15  
16  
17  
18  
19  
20  
21  
22  
23  
24  
25  
26  
27  
28  
29  
30  
31  
32  
33  
34  
35  
36  
37  
38  
39  
40  
41  
42  
43  
44  
45  
46  
47  
48  
49  
50  
51  
52  
53  
54  
55  
56  
57  
58  
59  
60

For peer review only

## I. Abstract

**Introduction:** Postoperative delirium can be a serious consequence of major surgery, associated with longer hospital stays, readmission, cognitive and functional deterioration, and mortality. Delirium is an acute, reversible disorder characterized by fluctuating course, inattention, disorganized thinking, and altered level of consciousness. Delirium occurring in the hours immediately following anesthesia, and delirium occurring in the postoperative period of 1-5 days have been described as distinct clinical entities. This protocol describes an observational study with the aim of determining if delirium in the first hour following tracheal tube removal is a predictor of delirium in the five subsequent postoperative days. Improved understanding regarding the development of postoperative delirium would improve patient care and allow more effective implementation of delirium prevention measures.

**Methods and analysis:** Patients enrolled to the Electroencephalography Guidance of Anesthesia to Alleviate Geriatric Syndromes (ENGAGES) randomized controlled trial will be eligible for this sub-study. A validated delirium assessment method, the 3-minute Diagnostic Confusion Assessment Method (3D-CAM) and the Richmond Agitation and Sedation Scale (RASS) will be used to assess 100 patients for delirium at 30 minutes and 60 minutes following tracheal tube removal. Patients will also be assessed for delirium over postoperative days 1 to 5 using three validated methods, the Confusion Assessment Method (CAM), CAM for the Intensive Care Unit (CAM-ICU), and structured chart review. Logistic regression analysis will then be performed to test whether immediately postoperative delirium independently predicts subsequent postoperative delirium.

**Ethics and dissemination:** This observational sub-study of ENGAGES has been approved by the ethics board of Washington University School of Medicine. Enrollment began in June 2016 and will continue until June 2017. Dissemination plans include presentations at scientific conferences and scientific publications.

**Registration:** This protocol describes a sub-study of ENGAGES, which is registered at [clinicaltrials.gov](http://clinicaltrials.gov), NCT02241655 (last updated December 23, 2015).

## II. Article summary

### a. Strengths and limitations

#### Strengths:

- The 3-minute Diagnostic Confusion Assessment Method (3D-CAM) is a validated, appropriate method for assessment of delirium in the PACU or ICU patient population at multiple time points during their stay.
- Delirium assessments at 30 and 60 minutes after tracheal tube removal will allow serial evaluation of the development of delirium signs over the course of the immediate postoperative period

## Limitations

- This sub-study is being conducted at only one academic medical center, Barnes-Jewish Hospital, and is a convenience sample based on surgical patients who have already consented to participation in the SATISFY-SOS study and ENGAGES trial.
- Patients may experience survey fatigue and be unwilling to complete 3D-CAM assessments at the 30 or 60 minute time points, or additional delirium assessments in postoperative days 1 to 5.
- The results of two types of delirium assessments will be compared in order to determine whether delirium in the first hour following tracheal tube removal is a predictor of delirium in the five subsequent postoperative days.

## III. Introduction

### a. Background and rationale

The following protocol is compliant with published guidelines for observational study protocols (1). This study intends to answer the research question of whether delirium in the first hour post-tracheal tube removal, assessed in the post-anesthesia care unit (PACU) or intensive care unit (ICU), is independently predictive of delirium on postoperative days 1 to 5.

Delirium is an acute, reversible disorder of attention, cognition and level of consciousness (2). Postoperative delirium is a serious and common complication of major surgery, especially for older patients. Postoperative delirium is associated with longer hospital stays, readmission, cognitive deterioration, morbidity, and mortality. Accurate assessment for delirium during the postoperative recovery period might help guide decision-making for treatment and rehabilitation in order to prevent negative outcomes.

It is common practice for patients to be admitted to a PACU or ICU following completion of surgery. Patients are observed in the PACU until an attending physician determines that they are discharge-ready, according to specific criteria, such as activity, respiration, circulation, consciousness, and color, as elaborated in the Aldrete score (3). Approximately 80% of patients at our hospital are eligible for PACU discharge between 1 hour and 3 hours after PACU admission (4). During the first 3 postoperative hours, a large number of patients present with delirium, more commonly of the hypoactive type than of the hyperactive type. Especially in cases of hyperactivity, postoperative delirium can have direct consequences, as patients may fall from their beds; attempt urine catheter extraction, intravenous line removal, or tracheal tube withdrawal; and cause injuries to themselves or to staff (5). In a study of 400 patients conducted by Card et al., 124 patients (31%) displayed signs of delirium at PACU admission, and 65 patients (16%) had delirium signs during their PACU stay (6). Delirium presenting in the PACU has been referred to as “emergence delirium” and may be attributable to residual effects

1  
2  
3 of general anesthesia, and should theoretically resolve within minutes to hours.  
4 Postoperative delirium, arbitrarily defined as occurring 1 to 5 days following surgery,  
5 may have distinct etiologies from emergence delirium in the PACU. The relationship  
6 between delirium occurring immediately following surgery and emergence from  
7 anesthesia and postoperative delirium after the day of surgery is currently not known.  
8  
9

10  
11 Several studies have suggested an association between emergence delirium,  
12 manifesting in the PACU, and postoperative delirium, manifesting after the day of  
13 surgery (6–9). However, these studies each employed different methods for assessing  
14 emergence delirium. Card et al. used the Confusion Assessment Method for the  
15 Intensive Care Unit (CAM-ICU) for identifying patients with delirium, and the Richmond  
16 Agitation-Sedation Scale (RASS) to classify the delirium as hyper or hypoactive (6,10–  
17 12). This study found that of the 16% of subjects found to have delirium signs during  
18 their PACU stay, when assessed at 30min, 60min, and at discharge, 92% exhibited  
19 signs of the hypoactive subtype and 8% exhibited signs of the hyperactive subtype (6).  
20 This is compared to the findings at time of PACU admission when 31% of patients had  
21 signs of delirium of which, 56% exhibited signs of the hypoactive subtype and 44%  
22 exhibited signs of the hyperactive subtype (6). A study of 91 patients conducted by  
23 Neufeld et al. using psychiatrist evaluation based on DSM4 criteria found a 45%  
24 prevalence of delirium in the PACU (8). Out of 19 episodes of postoperative delirium  
25 found, 14 (74%) had experienced emergence delirium while in the PACU (8). Using the  
26 Nu-DESC assessment for delirium, a cumulative observational scoring system including  
27 disorientation, inappropriate behavior, inappropriate communication,  
28 illusions/hallucinations, and psychomotor retardation, assessed in three time periods for  
29 a total of 12 hours, Radtke et al. observed an 11% prevalence of emergence delirium in  
30 the PACU (7). Of 38 patients who experienced delirium in the first postoperative day  
31 (38/862 = 4.2%), 32 (84.2%) had previously displayed emergence delirium (7). In their  
32 population of 47 hip-fracture repair patients, Sharma et al. employed the unabbreviated  
33 Confusion Assessment Method (CAM) assessment at 60 minutes after discontinuation  
34 of isoflurane and found a prevalence of emergence delirium of 45%. Of these patients,  
35 36% subsequently experienced postoperative delirium, and delirium in the PACU was a  
36 strong predictor of subsequent postoperative delirium, according to a Fisher's Exact  
37 Test ( $P < 0.001$ ) with 100% sensitivity and 85% specificity. (9).  
38  
39  
40  
41  
42  
43

44 The Confusion Assessment Method (CAM) is a validated and widely-used delirium  
45 assessment instrument that is used primarily by non-psychiatrists (13). Both the CAM-  
46 ICU and the 3-minute Diagnostic Confusion Assessment Method (3D-CAM) are  
47 abbreviated delirium assessments derived from the CAM, with the CAM-ICU designed  
48 specifically for assessing intubated or nonverbal patients (11,12). The 3D-CAM consists  
49 of a subset of the assessment components used in the CAM, designed to only take 3  
50 minutes, supplemented by a series of questions regarding patient behavior during the  
51 interview to be completed by the interviewer following the patient visit (11). The major  
52 advantage of both the 3D-CAM and CAM-ICU compared to the unabbreviated CAM are  
53 the assessments' relative brevity.  
54  
55  
56  
57  
58  
59  
60

1  
2  
3 The 3D-CAM and CAM-ICU require similar time to complete. A previous study  
4 comparing related methods of delirium assessment estimated sensitivity of 93% and  
5 specificity of 96% for the 3D-CAM in detecting delirium in patients without dementia as  
6 compared to the CAM (11). A study comparing the 3D-CAM and CAM-ICU directly in a  
7 general medicine patient population aged >75 found a 95% sensitivity for the 3D CAM  
8 [95% CI 74-100%] and a 53% sensitivity for the CAM-ICU [95% CI 29-76%] (14). The  
9 3D-CAM and CAM-ICU were both reported as having >90% specificity for detecting  
10 delirium (14). Unlike the CAM-ICU, the 3D-CAM requires the patient to verbally answer  
11 questions assessing for orientation and attention. These features are emphasized in the  
12 DSM-V over altered level of consciousness, which the CAM-ICU assesses by  
13 incorporating the RASS score into its delirium assessment (11). In this study, the 3D-  
14 CAM is chosen over the CAM-ICU its higher sensitivity in detecting delirium in verbal  
15 patients.  
16  
17  
18  
19

#### 20 b. Specific aims

##### 21 Aim 1

22 This study aims to determine if delirium in the first hour post-tracheal tube removal is  
23 predictive of delirium in the five subsequent postoperative days.  
24  
25  
26

27 We hypothesize that delirium in the first hour post-tracheal tube removal is  
28 independently predictive of delirium manifesting during postoperative days 1-5.  
29  
30

#### 31 c. Significance

32  
33 Postoperative delirium is a serious complication in patients who have undergone major  
34 surgery, especially among the older population. Improved understanding regarding the  
35 development of early-onset delirium and its association with delirium in the  
36 postoperative period can inform and improve patient care, with the goal of reducing  
37 delirium and its consequences.  
38  
39

## 40 **IV. Methods and analysis**

#### 41 a. Study design

42  
43 This retrospective study is a sub-study of both the Electroencephalography Guidance of  
44 Anesthesia to Alleviate Geriatric Syndromes Study (ENGAGES, NCT02241655) and the  
45 Systematic Assessment and Targeted Improvement of Services Following Yearlong  
46 Surgical Outcomes Surveys Study (SATISFY-SOS, NCT02032030), being conducted at  
47 Washington University. ENGAGES is a randomized clinical trial to determine whether  
48 EEG-guided anesthesia care can reduce the incidence of postoperative delirium and  
49 improve health-related quality of life postoperatively, when compared to usual  
50 anesthesia care. SATISFY-SOS is an ongoing cohort study that is obtaining detailed  
51 information on unselected surgical patients, and is tracking their health and well-being in  
52 the intermediate term postoperatively. All members of the ENGAGES trial are also  
53  
54  
55  
56  
57  
58  
59  
60



1  
2  
3 enrolled in SATISFY-SOS, and the patients included in the current study will be  
4 comprised of ENGAGES participants only.  
5  
6

7 i. Delirium assessment method  
8

9  
10 The primary outcome in this study is the presence of delirium in the immediate  
11 postoperative period, within 1 hour following tracheal tube removal after the completion  
12 of surgery.  
13

14 Only patients who are not delirious prior to surgery are enrolled in the ENGAGES trial.  
15 As stated in the SATISFY-SOS consent, patients can be assessed for delirium up to two  
16 times per day. In this sub-study, 3D-CAM assessments will be performed in the PACU  
17 or ICU at 30 minutes and at 1 hour following tracheal tube removal. The presence of  
18 delirium in the first hour will be defined as a positive 3D-CAM assessment at either of  
19 these two time points. The characteristics of 1) acute onset/fluctuating course, 2)  
20 inattention, and 3) disorganized thinking OR altered level of consciousness must be  
21 observed in the patient based on information gathered during the 3D-CAM assessment  
22 for delirium to be considered present. Should a patient decline participation in the 3D-  
23 CAM at a given time point, researchers will still ask that patient to participate at any  
24 remaining time point in the study.  
25  
26  
27

28 All assessments will be performed by individuals rigorously trained in both the full CAM  
29 assessment and 3D-CAM assessment.  
30  
31

32 All procedures in this study will be conducted in the same manner for patients in either  
33 the ICU or the PACU. Staff in the PACUs and the ICUs will be informed of the purpose  
34 and the procedures of the study.  
35  
36

37 ii. Sample size  
38

39 We base our sample size calculations on the unadjusted relationship between PACU  
40 delirium and postoperative delirium found in a prior study. This study found the crude  
41 odds ratio to be approximately 3.9 (6). Since our first hour after tracheal tube removal  
42 delirium measurements and postoperative delirium measurements occur in the same  
43 patient, we use the McNemar test for dependent pairs. Conservatively assuming an  
44 odds ratio of 3.0, along with 80% power and  $\alpha$  of 0.05, two tails, and 30% discordant  
45 pairs (6), the required sample size is 100 patients. Assuming 10% of patients are unable  
46 to be assessed, we will enroll 110 patients.  
47  
48  
49

50 iii. Blinding  
51

52  
53 Researchers responsible for performing delirium assessments in the ICU and PACU as  
54 part of this study will be blinded from the patient's group status in the ENGAGES study  
55 and will not participate in intraoperative monitoring, postoperative assessments in the  
56 first five postoperative days, or delirium chart review. 3D-CAM assessments performed  
57  
58  
59  
60

1  
2  
3 in this study will be reviewed and entered into the REDCap database by a second  
4 researcher to ensure accuracy in the delirium assessment.  
5  
6

7 Assessors of delirium in the postoperative period and in the delirium chart review for the  
8 ENGAGES study will be blinded from the results of delirium assessments performed in  
9 the ICU and PACU as part of this study.  
10

#### 11 b. Study group and consenting process

12  
13  
14 The target population for this study comprises all patients undergoing elective surgery at  
15 Barnes Jewish Hospital beginning June 8, 2016 and until the study enrollment goal of  
16 100 assessed patients is reached. Patients who consent to participation in both the  
17 SATISFY-SOS and ENGAGES studies are eligible for this study. Patients may choose  
18 to refuse participation in this study at any time point.  
19

20  
21 We note that not all patients undergoing surgical procedures at Barnes Jewish Hospital  
22 will have the opportunity to participate in this study.  
23

#### 24 i. Eligibility criteria

25  
26  
27 Inclusion criteria:

28  
29 In order to be included in this study, patients must be:

- 30  
31  
32 (i) Enrolled in the SATISFY-SOS study or ENGAGES study (Appendix A);  
33 (ii) Tracheal tube removal on postoperative day 0 before 7pm.  
34

#### 35 c. Data

36  
37  
38 The following are the types of data that we anticipate using in this study. These  
39 parameters have significant overlap with the data already being collected on patients  
40 enrolled in ENGAGES.  
41

42 We will collect the following patient baseline characteristics: age, sex, race, smoking  
43 history, alcohol history, dementia, pre-existing medical or surgical conditions,  
44 preoperative medications (including benzodiazepines, antidepressants, neuroleptics,  
45 analgesics), previous surgical procedures in the last 3 months. For our analysis, we will  
46 be calculating each patient's Charlson Comorbidity Index score and their score on the  
47 Short Blessed Test.  
48  
49

50 We will collect the following data regarding patient surgery: type of surgery, duration of  
51 surgery, duration of anesthesia, anesthesia protocol and dose, time of tracheal tube  
52 removal, complications or adverse events.  
53  
54

55 The primary outcome in this study is the presence of delirium During the PACU or ICU  
56 stay, delirium assessments using the 3D-CAM will be performed at 30 minutes and at  
57  
58  
59  
60

1  
2  
3 60 minutes following tracheal tube removal in either the PACU or ICU. If an eligible  
4 patient is approached but unable to or declines to participate in the study at either or  
5 both time points, the reason(s) for the non-assessment will be recorded. We anticipate  
6 reasons for non-assessment to include logistical barrier to approach patient, patient  
7 inability to complete the verbal assessment, and active decline to participate by the  
8 patient. Patients are considered incapable of verbal communication and completion of  
9 delirium assessment at that time if they do not express themselves verbally to any  
10 prompt or stimulus. Information regarding the length of stay in PACU or ICU, RASS  
11 score at both time points, nurse reports, adverse events, or interventions will also be  
12 collected.  
13  
14

15  
16 Data regarding the postoperative period will also be collected from the ENGAGES  
17 database: daily CAM assessments performed according to the ENGAGES protocol,  
18 which states that delirium will be diagnosed by a combination of CAM assessments, the  
19 full CAM or the CAM-ICU, and the delirium chart review, where a researcher blinded to  
20 the CAM/CAM-ICU results will do a comprehensive chart review to detect any  
21 incidences of delirium and identify postoperative medications, duration of hospital stay,  
22 nurse reports, adverse events, or additional interventions.  
23  
24

25  
26 All electronic data collected in the course of this study, as well as the SATISFY-SOS  
27 and ENGAGES databases, are hosted on a firewall-secured network server. This server  
28 is managed and maintained by the IT team of the Department of Anesthesiology, and is  
29 securely housed behind two locked doors in the departmental offices. The project  
30 Informaticist, Data Manager, and Director(s) are the only individuals with full access to  
31 these password-protected and encrypted databases. Delirium assessments performed  
32 in the ICU and PACU are completed using paper surveys and are securely stored within  
33 the department and their results are entered into a REDCap database.  
34  
35

#### 36 37 i. Statistical considerations

38  
39 First, we will calculate the crude association between delirium within the first hour after  
40 tracheal tube removal and postoperative delirium using the McNemar test for two  
41 dependent variables.  
42  
43

44 Multivariable logistic regression will be performed with the presence of delirium in the  
45 postoperative period as the dependent variable and the presence of delirium as  
46 detected in the PACU or ICU by positive 3D-CAM, which is the principle type of data  
47 collected in this study, will serve as the independent variable of interest. We assume a  
48 25% prevalence of postoperative delirium within the first hour following tracheal tube  
49 removal in our study population based on previous studies (15,16). With 100 assessed  
50 patients, the model would have a sufficient number of outcome events (25) to include  
51 early delirium within the first hour after tracheal tube removal along with three  
52 confounders, assuming 6 outcome events are needed per variable (17). The three  
53 confounders that will be included in the model are age (continuous), Short Blessed Test  
54 (continuous) (18,19), and Charlson Comorbidity Index (continuous) (20,21). Age of 65  
55 years or older, cognitive impairment, dementia, and coexisting medical conditions  
56  
57  
58  
59  
60

1  
2  
3 including multiple comorbidities, chronic renal or hepatic disease, stroke, and neurologic  
4 have been consistently described as risk factors for postoperative delirium (22). We will  
5 perform additional sensitivity analyses using the assumptions that 1) active patient  
6 decline of delirium assessment and 2) inability to give verbal responses represent  
7 postoperative delirium in the first hour following tracheal tube removal in those patients.  
8  
9

10 Additional analyses may be performed *post-hoc* with the descriptive data collected  
11 through the ENGAGES and SATISFY-SOS databases if they are believed to contain  
12 significant confounders.  
13

14  
15 Coefficients to variables will be considered significant at level of  $\alpha < 0.05$ . Results will be  
16 reported as odds ratios with 95% confidence intervals. We pre-specify the minimum  
17 important odds ratio for having potential predictive utility would be a >20% change in  
18 either direction (i.e. OR < 0.8 or > 1.2) (23). The 3D-CAM is less sensitive than the CAM  
19 for delirium detection (11). Therefore, it is possible that some episodes of delirium in the  
20 PACU or ICU will not be detected with the 3D-CAM. This increases the possibility that  
21 our study will not detect an association between delirium in the PACU or ICU and  
22 postoperative delirium even if such an association is present (i.e., false negative result).  
23  
24  
25

#### 26 d. Anticipated results

27  
28 We anticipate that the presence of delirium in the first hour post-tracheal tube removal  
29 will be identified as an independent predictor of delirium later on in the postoperative  
30 period.  
31  
32

#### 33 e. Strengths and limitations

##### 34 i. Strengths

35  
36 We believe that the 3D-CAM is an appropriate method of assessing for delirium in the  
37 PACU or ICU patient population at multiple time points during their stay. Previous  
38 studies have suggested that the 3D-CAM has high sensitivity and specificity in detecting  
39 delirium, and greater sensitivity when compared to the CAM-ICU (9,11,14).  
40  
41  
42

43  
44 Performing two brief assessments for delirium at time points 30 and 60 minutes after  
45 tracheal tube removal has several advantages. It will allow the assessment of delirium  
46 to be more accurate in each patient, increase the likelihood of completing at least one  
47 assessment per patient, and track the development of delirium signs over the course of  
48 the immediate postoperative period.  
49  
50

##### 51 ii. Limitations

52  
53 This study has several limitations. It is being conducted at only one academic medical  
54 center, Barnes-Jewish Hospital. The sample is a convenience sample based on surgical  
55 patients who have already consented to participation in SATISFY-SOS study and the  
56 ENGAGES trial.  
57  
58  
59  
60

1  
2  
3  
4  
5 We foresee limitations regarding our capacity to accurately monitor tracheal tube  
6 removal times, though we will work with PACU and ICU staff in order to communicate  
7 effectively and approach patients at our desired time intervals after tracheal tube  
8 removal. Researchers will ensure that delirium assessments are performed as close to  
9 30 minutes and 60 minutes post-tracheal tube removal as possible. However, due to  
10 logistical considerations such as patient transport and Anesthesia team handoff,  
11 patients may not be available to approach for delirium at either time point.  
12

13  
14 We anticipate that a significant proportion of patients may be unwilling to participate in  
15 the 3D-CAM during their stay in the PACU or ICU. For example, many more patients  
16 may elect to complete a single 3D-CAM at 30 minutes post-tracheal tube removal rather  
17 than at both time points. Patient responses to the 3D-CAM administered at the 2<sup>nd</sup> time  
18 point may also be influenced by their 3D-CAM at 30 minutes after tracheal tube  
19 removal; i.e. they may experience survey fatigue. It is also possible that participation in  
20 this study may impact a patient's willingness to continue their enrollment in ENGAGES,  
21 including the completion of the full CAM in the first five postoperative days and other  
22 types of data collected in ENGAGES.  
23  
24

25  
26 It is not ideal to compare incidence of emergence delirium as assessed by 3D-CAM in  
27 the PACU or ICU with delirium incidence assessed by the unabbreviated CAM, CAM-  
28 ICU, or delirium chart review in the postoperative period. While the CAM is a validated  
29 instrument for detection of delirium by non-psychiatrists, it does take much longer to  
30 administer. As it will be advantageous for this study to assess for delirium at two  
31 different time points in a relatively short period, we feel that the advantages of using the  
32 3D-CAM outweigh the possible losses in sensitivity and specificity that will result from  
33 departure from the full CAM.  
34  
35

#### 36 f. Compliance

37  
38  
39 As this is an observational study, no procedures for monitoring exposure compliance  
40 are necessary. Patients may be withdrawn from this study, as well as SATISFY-SOS, or  
41 ENGAGES if requested. As described in the consent forms for SATISFY-SOS and  
42 ENGAGES, data already collected may continue to be used.  
43  
44

### 45 V. Ethical considerations

46  
47  
48 We have considered the burden imposed on patients having to undergo two successive  
49 3D-CAM assessments in the first hour after tracheal tube removal. As the 3D-CAM is  
50 very limited in duration, usually requiring patient participation for 3 minutes (9), we  
51 believe the selection of this assessment method is acceptable. We do not believe that  
52 participation in the 3D-CAM up to 2 times during PACU or ICU stay will have any  
53 negative effects on patient care or postoperative outcomes.  
54  
55

56 This study has received institutional IRB approval at Washington University School of  
57 Medicine IRB ID#201612007 on December 8, 2016.  
58  
59  
60



1  
2  
3  
4  
5 a. Finance and insurance  
6

7 This study involves little-to-no risk to patients, and patients will not be compensated for  
8 participation. There are no relevant finance details, insurance details, or covers for  
9 negligent and non-negligent harm in this study.  
10

11  
12 b. Reporting and dissemination  
13

14 Results of this study will be presented at national meetings and published in a scientific  
15 journal. Participants will not be individually notified regarding the results of this study.  
16

17  
18 **VI. References**  
19

- 20  
21 1. Editors TPM. Observational Studies: Getting Clear about Transparency. *PLOS*  
22 *Med.* 2014 Aug 26;11(8):e1001711.  
23 2. Fong TG, Tulebaev SR, Inouye SK. Delirium in elderly adults: diagnosis,  
24 prevention and treatment. *Nat Rev Neurol.* 2009 Apr;5(4):210–20.  
25 3. Aldrete JA, Kroulik D. A postanesthetic recovery score. *Anesth Analg.* 1970  
26 Dec;49(6):924–34.  
27 4. Fritz BA, Rao P, Mashour GA, Abdallah A ben, Burnside BA, Jacobsohn E, et al.  
28 Postoperative Recovery with Bispectral Index versus Anesthetic Concentration–  
29 guided Protocols: *Anesthesiology.* 2013 May;118(5):1113–22.  
30 5. Munk L, Andersen G, Møller AM. Post-anaesthetic emergence delirium in adults:  
31 incidence, predictors and consequences. *Acta Anaesthesiol Scand.* 2016 Mar  
32 1;n/a-n/a.  
33 6. Card E, Pandharipande P, Tomes C, Lee C, Wood J, Nelson D, et al. Emergence  
34 from general anaesthesia and evolution of delirium signs in the post-anaesthesia  
35 care unit. *Br J Anaesth.* 2015 Sep 1;115(3):411–7.  
36 7. Radtke FM, Franck M, MacGuill M, Seeling M, Lütz A, Westhoff S, et al. Duration  
37 of fluid fasting and choice of analgesic are modifiable factors for early  
38 postoperative delirium. *Eur J Anaesthesiol.* 2010 May;27(5):411–6.  
39 8. Neufeld KJ, Leoutsakos J-MS, Sieber FE, Wanamaker BL, Gibson Chambers JJ,  
40 Rao V, et al. Outcomes of Early Delirium Diagnosis After General Anesthesia in  
41 the Elderly. *Anesth Analg.* 2013 Aug;117(2):471–8.  
42 9. Sharma PT, Sieber FE, Zakriya KJ, Pauldine RW, Gerold KB, Hang J, et al.  
43 Recovery Room Delirium Predicts Postoperative Delirium After Hip-Fracture  
44 Repair: *Anesth Analg.* 2005 Oct;101(4):1215–20.  
45 10. Sessler CN, Gosnell MS, Grap MJ, Brophy GM, O’Neal PV, Keane KA, et al. The  
46 Richmond Agitation–Sedation Scale. *Am J Respir Crit Care Med.* 2002 Nov  
47 15;166(10):1338–44.  
48 11. Marcantonio ER, Ngo LH, O’Connor M, Jones RN, Crane PK, Metzger ED, et al.  
49 3D-CAM: Derivation and Validation of a 3-Minute Diagnostic Interview for CAM-  
50 Defined DeliriumA Cross-sectional Diagnostic Test Study3D-CAM: Derivation  
51 and Validation of a 3-Minute Interview for Delirium. *Ann Intern Med.* 2014 Oct  
52 21;161(8):554–61.  
53  
54  
55  
56  
57  
58  
59  
60

12. Ely EWM, Margolin R, Francis JM, May LR, Truman BR, Dittus RM, et al. Evaluation of delirium in critically ill patients: Validation of the Confusion Assessment Method for the Intensive Care Unit (CAM-ICU). *Crit Care Med*. 2001 Jul;29(7):1370–9.
13. Inouye SK, van Dyck CH, Alessi CA, Balkin S, Siegal AP, Horwitz RI. Clarifying Confusion: The Confusion Assessment Method A New Method for Detection of Delirium. *Ann Intern Med*. 1990 Dec 15;113(12):941–8.
14. Kuczmarska A, Ngo LH, Guess J, O'Connor MA, Branford-White L, Palihnich K, et al. Detection of Delirium in Hospitalized Older General Medicine Patients: A Comparison of the 3D-CAM and CAM-ICU. *J Gen Intern Med*. 2015 Oct 6;31(3):297–303.
15. Fritz BA, Kalarickal PL, Maybrier HR, Muench MR, Dearth D, Chen Y, et al. Intraoperative Electroencephalogram Suppression Predicts Postoperative Delirium: *Anesth Analg*. 2016 Jan;122(1):234–42.
16. Whitlock EL, Torres BA, Lin N, Helsten DL, Nadelson MR, Mashour GA, et al. Postoperative delirium in a substudy of cardiothoracic surgical patients in the BAG-RECALL clinical trial. *Anesth Analg*. 2014 Apr;118(4):809–17.
17. Vittinghoff E, McCulloch CE. Relaxing the Rule of Ten Events per Variable in Logistic and Cox Regression. *Am J Epidemiol*. 2007 Mar 15;165(6):710–8.
18. SBT-PACKET.pdf [Internet]. [cited 2016 May 19]. Available from: <http://alzheimer.wustl.edu/adrc2/Images/SBT-PACKET.pdf>
19. Blessed G, Tomlinson BE, Roth M. The Association Between Quantitative Measures of Dementia and of Senile Change in the Cerebral Grey Matter of Elderly Subjects. *Br J Psychiatry*. 1968 Jul 1;114(512):797–811.
20. Hall WH, Ramachandran R, Narayan S, Jani AB, Vijayakumar S. An electronic application for rapidly calculating Charlson comorbidity score. *BMC Cancer*. 2004 Dec 20;4:94.
21. Charlson M, Szatrowski TP, Peterson J, Gold J. Validation of a combined comorbidity index. *J Clin Epidemiol*. 1994 Nov 1;47(11):1245–51.
22. Inouye SK. Delirium in Older Persons. *N Engl J Med*. 2006 Mar 16;354(11):1157–65.
23. Methods Guide for Effectiveness and Comparative Effectiveness Reviews - Overview | AHRQ Effective Health Care Program [Internet]. *Effective Health Care*. 2014 [cited 2016 May 19]. Available from: <http://effectivehealthcare.ahrq.gov/index.cfm/search-for-guides-reviews-and-reports/?pageaction=displayproduct&productid=318>

## VII. Author contributions

VC and CMT contributed equally to study conceptualization, statistical design, protocol drafting, and protocol editing.

VLK contributed to statistical design.

SLM completed the institutional IRB approval process.

MSA contributed to study conceptualization and protocol editing.

## VIII. Collaborators

The authors thank Jamila Burton, Daniel Emmert, Thomas Graetz, Shelly Gupta, Tony Lee, Hannah Maybrier, Angela Mickle, Maxwell Muench, Jordan Oberhaus, Ben Palanca, Aamil Patel, James Spencer, Chloe Stallion, Tracey Stevens, Brian Torres, Emma Trammel, Ravi Upadhyayula, and Troy Wildes.

## IX. Funding information

This work was supported by NIA Grants 1UH2AG050312-01 and 5UH3AG050312-03 as a sub-study of ENGAGES. SATISFY-SOS was supported by BJH Foundation grant BJHF#7937-77. Victoria Cui was supported by NIH Training Grant 2T35HL007815-21.

## X. Data Sharing

Data collection for this study is ongoing.

## XI. Competing interests

The authors report no conflicts of interest in conducting this study.

## XII. Appendix A

### a. ENGAGES Inclusion and Exclusion Criteria

Inclusion:

1. Adults older than 60;
2. competent to provide informed consent;
3. undergoing major elective surgery requiring a minimum stay of 2 days postoperatively (e.g., major open cardiac, thoracic, vascular, intra-abdominal, gynecologic, urologic, orthopedic, hepato-biliary and ear, nose and throat surgery);
4. enrolled in the SATISFY-SOS study

Exclusion:

1. Unable to provide informed consent;
2. undergoing neurosurgical procedures;
3. preoperative delirium;
4. unable to participate adequately in delirium screening including those who are blind, deaf, illiterate or not fluent in English;
5. history of intraoperative awareness;
6. additional surgery planned within five days of index surgery

### b. SATISFY-SOS Inclusion and Exclusion Criteria

Inclusion:



- 1
  - 2
  - 3
  - 4
  - 5
  - 6
  - 7
  - 8
  - 9
  - 10
  - 11
  - 12
  - 13
  - 14
  - 15
  - 16
  - 17
  - 18
  - 19
  - 20
  - 21
  - 22
  - 23
  - 24
  - 25
  - 26
  - 27
  - 28
  - 29
  - 30
  - 31
  - 32
  - 33
  - 34
  - 35
  - 36
  - 37
  - 38
  - 39
  - 40
  - 41
  - 42
  - 43
  - 44
  - 45
  - 46
  - 47
  - 48
  - 49
  - 50
  - 51
  - 52
  - 53
  - 54
  - 55
  - 56
  - 57
  - 58
  - 59
  - 60
1. Surgical and procedural patients who require anesthesia services

Exclusion:

1. Patients under the age of 18 years

For peer review only

STROBE Statement—Checklist of items that should be included in reports of *cross-sectional studies*

Title: **Protocol for an observational study of delirium in the Post-Anesthesia Care Unit (PACU) as a potential predictor of subsequent postoperative delirium**

|                              | Item No | Recommendation                                                                                                                                                                                                                                                                                                                                                |
|------------------------------|---------|---------------------------------------------------------------------------------------------------------------------------------------------------------------------------------------------------------------------------------------------------------------------------------------------------------------------------------------------------------------|
| <b>Title and abstract</b>    | 1       | (a) Indicate the study's design with a commonly used term in the title or the abstract<br><b>Complete</b>                                                                                                                                                                                                                                                     |
|                              |         | (b) Provide in the abstract an informative and balanced summary of what was done and what was found <b>Complete</b>                                                                                                                                                                                                                                           |
| <b>Introduction</b>          |         |                                                                                                                                                                                                                                                                                                                                                               |
| Background/rationale         | 2       | Explain the scientific background and rationale for the investigation being reported<br><b>Complete</b>                                                                                                                                                                                                                                                       |
| Objectives                   | 3       | State specific objectives, including any prespecified hypotheses<br><b>Complete</b>                                                                                                                                                                                                                                                                           |
| <b>Methods</b>               |         |                                                                                                                                                                                                                                                                                                                                                               |
| Study design                 | 4       | Present key elements of study design early in the paper<br><b>Complete</b>                                                                                                                                                                                                                                                                                    |
| Setting                      | 5       | Describe the setting, locations, and relevant dates, including periods of recruitment, exposure, follow-up, and data collection<br><b>Complete</b>                                                                                                                                                                                                            |
| Participants                 | 6       | (a) Give the eligibility criteria, and the sources and methods of selection of participants<br><b>Complete</b>                                                                                                                                                                                                                                                |
| Variables                    | 7       | Clearly define all outcomes, exposures, predictors, potential confounders, and effect modifiers. Give diagnostic criteria, if applicable<br><b>Complete</b>                                                                                                                                                                                                   |
| Data sources/<br>measurement | 8*      | For each variable of interest, give sources of data and details of methods of assessment (measurement). Describe comparability of assessment methods if there is more than one group<br><b>Complete</b>                                                                                                                                                       |
| Bias                         | 9       | Describe any efforts to address potential sources of bias<br><b>Complete</b>                                                                                                                                                                                                                                                                                  |
| Study size                   | 10      | Explain how the study size was arrived at<br><b>Complete</b>                                                                                                                                                                                                                                                                                                  |
| Quantitative variables       | 11      | Explain how quantitative variables were handled in the analyses. If applicable, describe which groupings were chosen and why<br><b>Complete</b>                                                                                                                                                                                                               |
| Statistical methods          | 12      | <b>Complete</b><br>(a) Describe all statistical methods, including those used to control for confounding<br>(b) Describe any methods used to examine subgroups and interactions<br>(c) Explain how missing data were addressed<br>(d) If applicable, describe analytical methods taking account of sampling strategy<br>(e) Describe any sensitivity analyses |
| <b>Results</b>               |         |                                                                                                                                                                                                                                                                                                                                                               |
| Participants                 | 13*     | (a) Report numbers of individuals at each stage of study—eg numbers potentially eligible, examined for eligibility, confirmed eligible, included in the study, completing follow-up, and analysed <b>Complete</b>                                                                                                                                             |

|                          |     |                                                                                                                                                                                                              |
|--------------------------|-----|--------------------------------------------------------------------------------------------------------------------------------------------------------------------------------------------------------------|
|                          |     | (b) Give reasons for non-participation at each stage <b>Complete</b>                                                                                                                                         |
|                          |     | (c) Consider use of a flow diagram <b>Complete</b>                                                                                                                                                           |
| Descriptive data         | 14* | (a) Give characteristics of study participants (eg demographic, clinical, social) and information on exposures and potential confounders <b>Complete</b>                                                     |
|                          |     | (b) Indicate number of participants with missing data for each variable of interest<br><b>Data collection ongoing</b>                                                                                        |
| Outcome data             | 15* | Report numbers of outcome events or summary measures<br><b>Data collection ongoing</b>                                                                                                                       |
| Main results             | 16  | <b>Data collection ongoing</b>                                                                                                                                                                               |
|                          |     | (a) Give unadjusted estimates and, if applicable, confounder-adjusted estimates and their precision (eg, 95% confidence interval). Make clear which confounders were adjusted for and why they were included |
|                          |     | (b) Report category boundaries when continuous variables were categorized                                                                                                                                    |
|                          |     | (c) If relevant, consider translating estimates of relative risk into absolute risk for a meaningful time period                                                                                             |
| Other analyses           | 17  | Report other analyses done—eg analyses of subgroups and interactions, and sensitivity analyses<br><b>Data collection ongoing</b>                                                                             |
| <b>Discussion</b>        |     | <b>Data collection ongoing</b>                                                                                                                                                                               |
| Key results              | 18  | Summarise key results with reference to study objectives                                                                                                                                                     |
| Limitations              | 19  | Discuss limitations of the study, taking into account sources of potential bias or imprecision. Discuss both direction and magnitude of any potential bias                                                   |
| Interpretation           | 20  | Give a cautious overall interpretation of results considering objectives, limitations, multiplicity of analyses, results from similar studies, and other relevant evidence                                   |
| Generalisability         | 21  | Discuss the generalisability (external validity) of the study results                                                                                                                                        |
| <b>Other information</b> |     |                                                                                                                                                                                                              |
| Funding                  | 22  | Give the source of funding and the role of the funders for the present study and, if applicable, for the original study on which the present article is based<br><b>Complete</b>                             |

\*Give information separately for exposed and unexposed groups.

**Note:** An Explanation and Elaboration article discusses each checklist item and gives methodological background and published examples of transparent reporting. The STROBE checklist is best used in conjunction with this article (freely available on the Web sites of PLoS Medicine at <http://www.plosmedicine.org/>, Annals of Internal Medicine at <http://www.annals.org/>, and Epidemiology at <http://www.epidem.com/>). Information on the STROBE Initiative is available at [www.strobe-statement.org](http://www.strobe-statement.org).

# BMJ Open

## Protocol for an observational study of delirium in the Post-Anesthesia Care Unit (PACU) as a potential predictor of subsequent postoperative delirium

|                                 |                                                                                                                                                                                                                                                                                                                                         |
|---------------------------------|-----------------------------------------------------------------------------------------------------------------------------------------------------------------------------------------------------------------------------------------------------------------------------------------------------------------------------------------|
| Journal:                        | <i>BMJ Open</i>                                                                                                                                                                                                                                                                                                                         |
| Manuscript ID                   | bmjopen-2017-016402.R1                                                                                                                                                                                                                                                                                                                  |
| Article Type:                   | Protocol                                                                                                                                                                                                                                                                                                                                |
| Date Submitted by the Author:   | 03-May-2017                                                                                                                                                                                                                                                                                                                             |
| Complete List of Authors:       | Cui, Victoria; Washington University School of Medicine, Anesthesiology<br>Tedeschi, Catherine; Washington University School of Medicine, Anesthesiology<br>Kronzer, Vanessa<br>McKinnon, Sherry; Washington University School of Medicine, Anesthesiology<br>Avidan, Michael; Washington University School of Medicine, Anesthesiology |
| <b>Primary Subject Heading</b>: | Anaesthesia                                                                                                                                                                                                                                                                                                                             |
| Secondary Subject Heading:      | Surgery                                                                                                                                                                                                                                                                                                                                 |
| Keywords:                       | Delirium & cognitive disorders < PSYCHIATRY, Adult intensive & critical care < ANAESTHETICS, GERIATRIC MEDICINE                                                                                                                                                                                                                         |
|                                 |                                                                                                                                                                                                                                                                                                                                         |

SCHOLARONE™  
Manuscripts

**Title**

Protocol for an observational study of delirium in the Post-Anesthesia Care Unit (PACU) as a potential predictor of subsequent postoperative delirium

**Authors**

Victoria Cui<sup>1</sup>, Catherine M. Tedeschi<sup>1</sup>, Vanessa L. Kronzer<sup>1</sup>, Sherry L. McKinnon<sup>1</sup>, Michael S. Avidan<sup>1\*</sup>

<sup>1</sup>Department of Anesthesia, Washington University School of Medicine, Saint Louis, MO, 63110, USA

\*To whom correspondence should be addressed:

Michael S. Avidan  
<avidanm@wustl.edu>  
Washington University School of Medicine  
Campus Box 8054  
660 South Euclid Avenue  
St. Louis, MO 63110

## Table of Contents

- I. Abstract
- II. Article summary
  - a. Strengths and limitations
- III. Introduction
  - a. Background and rationale
  - b. Specific aims
  - c. Significance
- IV. Methods and analysis
  - a. Study Design
    - i. Delirium assessment method
    - ii. Sample size
    - iii. Blinding
  - b. Study group and consenting process
    - i. Eligibility criteria
  - c. Data
    - i. Statistical considerations
  - d. Anticipated results
  - e. Strengths and Limitations
    - i. Strengths
    - ii. Limitations
  - f. Compliance
- V. Ethical considerations
  - a. Finance and insurance
  - b. Reporting and dissemination
- VI. References
- VII. Author contributions
- VIII. Collaborators
- IX. Funding information
- X. Data Sharing
- XI. Competing interests

Appendix A – See separate file

1  
2  
3  
4  
5  
6  
7  
8  
9  
10  
11  
12  
13  
14  
15  
16  
17  
18  
19  
20  
21  
22  
23  
24  
25  
26  
27  
28  
29  
30  
31  
32  
33  
34  
35  
36  
37  
38  
39  
40  
41  
42  
43  
44  
45  
46  
47  
48  
49  
50  
51  
52  
53  
54  
55  
56  
57  
58  
59  
60

For peer review only

## I. Abstract

**Introduction:** Postoperative delirium can be a serious consequence of major surgery, associated with longer hospital stays, readmission, cognitive and functional deterioration, and mortality. Delirium is an acute, reversible disorder characterized by fluctuating course, inattention, disorganized thinking, and altered level of consciousness. Delirium occurring in the hours immediately following anesthesia, and delirium occurring in the postoperative period of 1-5 days have been described as distinct clinical entities. This protocol describes an observational study with the aim of determining if delirium in the first hour following tracheal tube removal is a predictor of delirium in the five subsequent postoperative days. Improved understanding regarding the development of postoperative delirium would improve patient care and allow more effective implementation of delirium prevention measures.

**Methods and analysis:** Patients enrolled to the Electroencephalography Guidance of Anesthesia to Alleviate Geriatric Syndromes (ENGAGES) randomized controlled trial will be eligible for this sub-study. A validated delirium assessment method, the 3-minute Diagnostic Confusion Assessment Method (3D-CAM) and the Richmond Agitation and Sedation Scale (RASS) will be used to assess 100 patients for delirium at 30 minutes and 60 minutes following tracheal tube removal. Patients will also be assessed for delirium over postoperative days 1 to 5 using three validated methods, the Confusion Assessment Method (CAM), CAM for the Intensive Care Unit (CAM-ICU), and structured chart review. Logistic regression analysis will then be performed to test whether immediately postoperative delirium independently predicts subsequent postoperative delirium.

**Ethics and dissemination:** This observational sub-study of ENGAGES has been approved by the ethics board of Washington University School of Medicine. Enrollment began in June 2016 and will continue until June 2017. Dissemination plans include presentations at scientific conferences and scientific publications.

**Registration:** This protocol describes a sub-study of ENGAGES, which is registered at [clinicaltrials.gov](http://clinicaltrials.gov), NCT02241655 (last updated December 23, 2015).

## II. Article summary

### a. Strengths and limitations

#### Strengths:

- The 3-minute Diagnostic Confusion Assessment Method (3D-CAM) is a validated, appropriate method for assessment of delirium in the PACU or ICU patient population at multiple time points during their stay.
- Delirium assessments at 30 and 60 minutes after tracheal tube removal will allow serial evaluation of the development of delirium signs over the course of the immediate postoperative period



## Limitations

- This sub-study has a relatively small sample size, is being conducted at only one academic medical center, Barnes-Jewish Hospital, and is a convenience sample based on surgical patients who have already consented to participation in the SATISFY-SOS study and ENGAGES trial.
- Patients may experience survey fatigue and be unwilling to complete 3D-CAM assessments at the 30 or 60 minute time points, or additional delirium assessments in postoperative days 1 to 5.
- The results of two types of delirium assessments will be compared in order to determine whether delirium in the first hour following tracheal tube removal is a predictor of delirium in the five subsequent postoperative days.

## III. Introduction

### a. Background and rationale

The following protocol is compliant with published guidelines for observational study protocols (1). This study intends to answer the research question of whether delirium in the first hour post-tracheal tube removal, assessed in the post-anesthesia care unit (PACU) or intensive care unit (ICU), is independently predictive of delirium on postoperative days 1 to 5.

Delirium is an acute, reversible disorder of attention, cognition and level of consciousness (2). Postoperative delirium is a serious and common complication of major surgery, especially for older patients. Postoperative delirium is associated with longer hospital stays, readmission, cognitive deterioration, morbidity, and mortality. Accurate assessment for delirium during the postoperative recovery period might help guide decision-making for treatment and rehabilitation in order to prevent negative outcomes.

It is common practice for patients to be admitted to a PACU or ICU following completion of surgery. Patients are observed in the PACU until an attending physician determines that they are discharge-ready, according to specific criteria, such as activity, respiration, circulation, consciousness, and color, as elaborated in the Aldrete score (3). Approximately 80% of patients at our hospital are eligible for PACU discharge between 1 hour and 3 hours after PACU admission (4). During the first 3 postoperative hours, a large number of patients present with delirium, more commonly of the hypoactive type than of the hyperactive type. Especially in cases of hyperactivity, postoperative delirium can have direct consequences, as patients may fall from their beds; attempt urine catheter extraction, intravenous line removal, or tracheal tube withdrawal; and cause injuries to themselves or to staff (5). In a study of 400 patients conducted by Card et al., 124 patients (31%) displayed signs of delirium at PACU admission, and 65 patients (16%) had delirium signs during their PACU stay (6). Delirium presenting in the PACU has been referred to as “emergence delirium” and may be attributable to residual effects

1  
2  
3 of general anesthesia, and should theoretically resolve within minutes to hours.  
4 Postoperative delirium, arbitrarily defined as occurring 1 to 5 days following surgery,  
5 may have distinct etiologies from emergence delirium in the PACU. The relationship  
6 between delirium occurring immediately following surgery and emergence from  
7 anesthesia and postoperative delirium after the day of surgery is currently not known.  
8  
9

10  
11 Several studies have suggested an association between emergence delirium,  
12 manifesting in the PACU, and postoperative delirium, manifesting after the day of  
13 surgery (6–9). However, these studies each employed different methods for assessing  
14 emergence delirium. Card et al. used the Confusion Assessment Method for the  
15 Intensive Care Unit (CAM-ICU) for identifying patients with delirium, and the Richmond  
16 Agitation-Sedation Scale (RASS) to classify the delirium as hyper or hypoactive (6,10–  
17 12). This study found that of the 16% of subjects found to have delirium signs during  
18 their PACU stay, when assessed at 30min, 60min, and at discharge, 92% exhibited  
19 signs of the hypoactive subtype and 8% exhibited signs of the hyperactive subtype (6).  
20 This is compared to the findings at time of PACU admission when 31% of patients had  
21 signs of delirium of which, 56% exhibited signs of the hypoactive subtype and 44%  
22 exhibited signs of the hyperactive subtype (6). A study of 91 patients conducted by  
23 Neufeld et al. using psychiatrist evaluation based on DSM4 criteria found a 45%  
24 prevalence of delirium in the PACU (8). Out of 19 episodes of postoperative delirium  
25 found, 14 (74%) had experienced emergence delirium while in the PACU (8). Using the  
26 Nu-DESC assessment for delirium, a cumulative observational scoring system including  
27 disorientation, inappropriate behavior, inappropriate communication,  
28 illusions/hallucinations, and psychomotor retardation, assessed in three time periods for  
29 a total of 12 hours, Radtke et al. observed an 11% prevalence of emergence delirium in  
30 the PACU (7). Of 38 patients who experienced delirium in the first postoperative day  
31 (38/862 = 4.2%), 32 (84.2%) had previously displayed emergence delirium (7). In their  
32 population of 47 hip-fracture repair patients, Sharma et al. employed the unabbreviated  
33 Confusion Assessment Method (CAM) assessment at 60 minutes after discontinuation  
34 of isoflurane and found a prevalence of emergence delirium of 45%. Of these patients,  
35 36% subsequently experienced postoperative delirium, and delirium in the PACU was a  
36 strong predictor of subsequent postoperative delirium, according to a Fisher's Exact  
37 Test ( $P < 0.001$ ) with 100% sensitivity and 85% specificity. (9).  
38  
39  
40  
41  
42  
43

44 The Confusion Assessment Method (CAM) is a validated and widely-used delirium  
45 assessment instrument that is used primarily by non-psychiatrists (13). Both the CAM-  
46 ICU and the 3-minute Diagnostic Confusion Assessment Method (3D-CAM) are  
47 abbreviated delirium assessments derived from the CAM, with the CAM-ICU designed  
48 specifically for assessing intubated or nonverbal patients (11,12). The 3D-CAM consists  
49 of a subset of the assessment components used in the CAM, designed to only take 3  
50 minutes, supplemented by a series of questions regarding patient behavior during the  
51 interview to be completed by the interviewer following the patient visit (11). The major  
52 advantage of both the 3D-CAM and CAM-ICU compared to the unabbreviated CAM are  
53 the assessments' relative brevity.  
54  
55  
56  
57  
58  
59  
60

1  
2  
3 The 3D-CAM and CAM-ICU require similar time to complete. A previous study  
4 comparing related methods of delirium assessment estimated sensitivity of 93% and  
5 specificity of 96% for the 3D-CAM in detecting delirium in patients without dementia as  
6 compared to the CAM (11). A study comparing the 3D-CAM and CAM-ICU directly in a  
7 general medicine patient population aged >75 found a 95% sensitivity for the 3D CAM  
8 [95% CI 74-100%] and a 53% sensitivity for the CAM-ICU [95% CI 29-76%] (14). The  
9 3D-CAM and CAM-ICU were both reported as having >90% specificity for detecting  
10 delirium (14). Unlike the CAM-ICU, the 3D-CAM requires the patient to verbally answer  
11 questions assessing for orientation and attention. These features are emphasized in the  
12 DSM-V over altered level of consciousness, which the CAM-ICU assesses by  
13 incorporating the RASS score into its delirium assessment (11). In this study, the 3D-  
14 CAM is chosen over the CAM-ICU its higher sensitivity in detecting delirium in verbal  
15 patients.  
16  
17  
18  
19

20 A strong association between emergence delirium as occurring in the PACU and  
21 delirium in the post-operative period would suggest the need for changes or additions to  
22 the standard of care for patients in the PACU. These changes could include delirium  
23 prevention methods, reliable identification of patients presenting with delirium, and  
24 prompt treatment of delirium.  
25  
26

27 Several interventions have been previously shown to reduce the rates of delirium  
28 developing during hospital care: regular orienting of patients to time and surroundings,  
29 reducing visual and auditory sensory deficits, maintaining adequate nutrition and fluids,  
30 ensuring adequate environment for sleep, encouraging mobility, and reducing use of  
31 medical restraints (2). Identification of delirium can be facilitated with the use of  
32 validated bedside screening methods such as the 3D-CAM or CAM-ICU by non-  
33 psychiatrist healthcare personnel. Non-pharmacological measures such as  
34 reorientation, correction of sensory deficits, providing a calm patient-care setting with  
35 fewer disturbances, and encouraging adequate sleep are preferred over the use of  
36 medications to treat acute delirium (2)  
37  
38  
39

40 Signs of delirium such as fluctuating level of consciousness and disorganized thinking  
41 should not be considered as part of the “normal” course for patients in the PACU.  
42 Instead, healthcare teams should integrate these findings into their care of patients and  
43 in recommendations given with patient hand-off following PACU stay. These findings  
44 should be considered when addressing each patient’s pain, analgesia regimen,  
45 sedation, and target sedation score as part of a tailored delirium treatment regimen(15).  
46  
47

#### 48 b. Specific aims 49

##### 50 Aim 1

51 This study aims to determine if delirium in the first hour post-tracheal tube removal is  
52 predictive of delirium in the five subsequent postoperative days.  
53  
54

55 We hypothesize that delirium in the first hour post-tracheal tube removal is  
56 independently predictive of delirium manifesting during postoperative days 1-5.  
57  
58  
59  
60

### c. Significance

Postoperative delirium is a serious complication in patients who have undergone major surgery, especially among the older population. Improved understanding regarding the development of early-onset delirium and its association with delirium in the postoperative period can inform and improve patient care, with the goal of reducing delirium and its consequences.

## IV. Methods and analysis

### a. Study design

This retrospective study is a sub-study of both the Electroencephalography Guidance of Anesthesia to Alleviate Geriatric Syndromes Study (ENGAGES, NCT02241655) and the Systematic Assessment and Targeted Improvement of Services Following Yearlong Surgical Outcomes Surveys Study (SATISFY-SOS, NCT02032030), being conducted at Washington University. ENGAGES is a randomized clinical trial to determine whether EEG-guided anesthesia care can reduce the incidence of postoperative delirium and improve health-related quality of life postoperatively, when compared to usual anesthesia care. SATISFY-SOS is an ongoing cohort study that is obtaining detailed information on unselected surgical patients, and is tracking their health and well-being in the intermediate term postoperatively. All members of the ENGAGES trial are also enrolled in SATISFY-SOS, and the patients included in the current study will be comprised of ENGAGES participants only.

#### i. Delirium assessment method

The primary outcome in this study is the presence of delirium in the immediate postoperative period, within 1 hour following tracheal tube removal after the completion of surgery.

Only patients who are not delirious prior to surgery are enrolled in the ENGAGES trial. As stated in the SATISFY-SOS consent, patients can be assessed for delirium up to two times per day. In this sub-study, 3D-CAM assessments will be performed in the PACU or ICU at 30 minutes and at 1 hour following tracheal tube removal. The presence of delirium in the first hour will be defined as a positive 3D-CAM assessment at either of these two time points. The characteristics of 1) acute onset/fluctuating course, 2) inattention, and 3) disorganized thinking OR altered level of consciousness must be observed in the patient based on information gathered during the 3D-CAM assessment for delirium to be considered present. Should a patient decline participation in the 3D-CAM at a given time point, researchers will still ask that patient to participate at any remaining time point in the study.

All assessments will be performed by individuals rigorously trained in both the full CAM assessment and 3D-CAM assessment.

1  
2  
3  
4 All procedures in this study will be conducted in the same manner for patients in either  
5 the ICU or the PACU. Staff in the PACUs and the ICUs will be informed of the purpose  
6 and the procedures of the study.  
7

8  
9  
10 ii. Sample size

11 We base our sample size calculations on the unadjusted relationship between PACU  
12 delirium and postoperative delirium found in a prior study. This study found the crude  
13 odds ratio to be approximately 3.9 (6). Since our first hour after tracheal tube removal  
14 delirium measurements and postoperative delirium measurements occur in the same  
15 patient, we use the McNemar test for dependent pairs. Conservatively assuming an  
16 odds ratio of 3.0, along with 80% power and  $\alpha$  of 0.05, two tails, and 30% discordant  
17 pairs (6), the required sample size is 100 patients. Assuming 10% of patients are unable  
18 to be assessed, we will enroll 110 patients.  
19  
20  
21

22  
23 iii. Blinding

24  
25 Researchers responsible for performing delirium assessments in the ICU and PACU as  
26 part of this study will be blinded from the patient's group status in the ENGAGES study  
27 and will not participate in intraoperative monitoring, postoperative assessments in the  
28 first five postoperative days, or delirium chart review. 3D-CAM assessments performed  
29 in this study will be reviewed and entered into the REDCap database by a second  
30 researcher to ensure accuracy in the delirium assessment.  
31  
32

33 Assessors of delirium in the postoperative period and in the delirium chart review for the  
34 ENGAGES study will be blinded from the results of delirium assessments performed in  
35 the ICU and PACU as part of this study.  
36  
37

38 b. Study group and consenting process

39  
40 The target population for this study comprises all patients undergoing elective surgery at  
41 Barnes Jewish Hospital beginning June 8, 2016 and until the study enrollment goal of  
42 100 assessed patients is reached. Patients who consent to participation in both the  
43 SATISFY-SOS and ENGAGES studies are eligible for this study. Patients may choose  
44 to refuse participation in this study at any time point.  
45  
46

47 We note that not all patients undergoing surgical procedures at Barnes Jewish Hospital  
48 will have the opportunity to participate in this study.  
49  
50

51 i. Eligibility criteria

52  
53 Inclusion criteria:

54  
55 In order to be included in this study, patients must be:  
56  
57  
58  
59  
60



- 1  
2  
3 (i) Enrolled in the SATISFY-SOS study or ENGAGES study (Appendix A);  
4 (ii) Tracheal tube removal on postoperative day 0 before 7pm.  
5  
6

7 c. Data  
8

9 The following are the types of data that we anticipate using in this study. These  
10 parameters have significant overlap with the data already being collected on patients  
11 enrolled in ENGAGES.  
12

13 We will collect the following patient baseline characteristics: age, sex, race, smoking  
14 history, alcohol history, dementia, pre-existing medical or surgical conditions,  
15 preoperative medications (including benzodiazepines, antidepressants, neuroleptics,  
16 analgesics), previous surgical procedures in the last 3 months. For our analysis, we will  
17 be calculating each patient's Charlson Comorbidity Index score and their score on the  
18 Short Blessed Test.  
19  
20

21 We will collect the following data regarding patient surgery: type of surgery, duration of  
22 surgery, duration of anesthesia, anesthesia protocol and dose, time of tracheal tube  
23 removal, complications or adverse events.  
24  
25  
26

27 The primary outcome in this study is the presence of delirium During the PACU or ICU  
28 stay, delirium assessments using the 3D-CAM will be performed at 30 minutes and at  
29 60 minutes following tracheal tube removal in either the PACU or ICU. If an eligible  
30 patient is approached but unable to or declines to participate in the study at either or  
31 both time points, the reason(s) for the non-assessment will be recorded. We anticipate  
32 reasons for non-assessment to include logistical barrier to approach patient, patient  
33 inability to complete the verbal assessment, and active decline to participate by the  
34 patient. Patients are considered incapable of verbal communication and completion of  
35 delirium assessment at that time if they do not express themselves verbally to any  
36 prompt or stimulus. Information regarding the length of stay in PACU or ICU, RASS  
37 score at both time points, nurse reports, adverse events, or interventions will also be  
38 collected.  
39  
40  
41

42 Data regarding the postoperative period will also be collected from the ENGAGES  
43 database: daily CAM assessments performed according to the ENGAGES protocol,  
44 which states that delirium will be diagnosed by a combination of CAM assessments, the  
45 full CAM or the CAM-ICU, and the delirium chart review, in which an ENGAGES  
46 research team member blinded to the CAM/CAM-ICU results will do a standardized,  
47 comprehensive chart review to detect any incidences of delirium and identify  
48 postoperative medications, duration of hospital stay, nurse reports, adverse events, or  
49 additional interventions. The delirium assessments performed in post-operative days 1-  
50 5 as well as the delirium chart review are conducted as part of the ENGAGES study  
51 protocol and provide necessary data for comparison of 3D-CAM assessments  
52 performed in the PACU as part of this study. Should this study be emulated at other  
53 sites, a delirium assessment method for the postoperative period would also need to be  
54 implemented.  
55  
56  
57  
58  
59  
60

1  
2  
3  
4  
5 All electronic data collected in the course of this study, as well as the SATISFY-SOS  
6 and ENGAGES databases, are hosted on a firewall-secured network server. This server  
7 is managed and maintained by the IT team of the Department of Anesthesiology, and is  
8 securely housed behind two locked doors in the departmental offices. The project  
9 Informaticist, Data Manager, and Director(s) are the only individuals with full access to  
10 these password-protected and encrypted databases. Delirium assessments performed  
11 in the ICU and PACU are completed using paper surveys and are securely stored within  
12 the department and their results are entered into a REDCap database.  
13

#### 14 15 i. Statistical considerations 16

17  
18 First, we will calculate the crude association between delirium within the first hour after  
19 tracheal tube removal and postoperative delirium using the McNemar test for two  
20 dependent variables.  
21

22  
23 Multivariable logistic regression will be performed with the presence of delirium in the  
24 postoperative period as the dependent variable and the presence of delirium as  
25 detected in the PACU or ICU by positive 3D-CAM, which is the principle type of data  
26 collected in this study, will serve as the independent variable of interest. We assume a  
27 25% prevalence of postoperative delirium within the first hour following tracheal tube  
28 removal in our study population based on previous studies (16,17). With 100 assessed  
29 patients, the model would have a sufficient number of outcome events, 25, to include  
30 early delirium within the first hour after tracheal tube removal along with three  
31 confounders, assuming 6 outcome events are needed per variable (18). The three  
32 confounders that will be included in the model are age (continuous), Short Blessed Test  
33 (continuous) (19,20), and Charlson Comorbidity Index (continuous) (21,22). Age of 65  
34 years or older, cognitive impairment, dementia, and coexisting medical conditions  
35 including multiple comorbidities, chronic renal or hepatic disease, stroke, and neurologic  
36 have been consistently described as risk factors for postoperative delirium (23). Though  
37 our sample size is relatively small, based on our assumptions there will be sufficient  
38 patients to examine the relationship between early-onset delirium and postoperative  
39 delirium, factoring in these three confounders. We will perform additional sensitivity  
40 analyses using the assumptions that 1) active patient decline of delirium assessment  
41 and 2) inability to give verbal responses represent postoperative delirium in the first  
42 hour following tracheal tube removal in those patients.  
43  
44  
45  
46

47  
48 Additional analyses may be performed *post-hoc* with the descriptive data collected  
49 through the ENGAGES and SATISFY-SOS databases if they are believed to contain  
50 significant confounders, which may include patient comorbidities, adverse events,  
51 medications administered, and surgery duration (24).  
52

53  
54 Coefficients to variables will be considered significant at level of  $\alpha < 0.05$ . Results will be  
55 reported as odds ratios with 95% confidence intervals. We pre-specify the minimum  
56 important odds ratio for having potential predictive utility would be a >20% change in  
57 either direction (i.e. OR < 0.8 or > 1.2) (25). The 3D-CAM is less sensitive than the CAM  
58  
59  
60

1  
2  
3 for delirium detection (11). Therefore, it is possible that some episodes of delirium in the  
4 PACU or ICU will not be detected with the 3D-CAM. This increases the possibility that  
5 our study will not detect an association between delirium in the PACU or ICU and  
6 postoperative delirium even if such an association is present (i.e., false negative result).  
7  
8

9  
10 d. Anticipated results

11 We anticipate that the presence of delirium in the first hour post-tracheal tube removal  
12 will be identified as an independent predictor of delirium later on in the postoperative  
13 period.  
14

15  
16 e. Strengths and limitations

17  
18 i. Strengths

19  
20 We believe that the 3D-CAM is an appropriate method of assessing for delirium in the  
21 PACU or ICU patient population at multiple time points during their stay. Previous  
22 studies have suggested that the 3D-CAM has high sensitivity and specificity in detecting  
23 delirium, and greater sensitivity when compared to the CAM-ICU (9,11,14).  
24  
25

26  
27 Performing two brief assessments for delirium at time points 30 and 60 minutes after  
28 tracheal tube removal has several advantages. It will allow the assessment of delirium  
29 to be more accurate in each patient, increase the likelihood of completing at least one  
30 assessment per patient, and track the development of delirium signs over the course of  
31 the immediate postoperative period.  
32  
33

34  
35 ii. Limitations

36  
37 This study has several limitations. It is being conducted at only one academic medical  
38 center, Barnes-Jewish Hospital. The sample is a convenience sample based on surgical  
39 patients who have already consented to participation in SATISFY-SOS study and the  
40 ENGAGES trial. The sample size of 100 patients is relatively small and will limit the  
41 precision of these estimates, but will likely be sufficient for exploration of the primary  
42 hypothesis.  
43  
44

45  
46 We foresee limitations regarding our capacity to accurately monitor tracheal tube  
47 removal times, though we will work with PACU and ICU staff in order to communicate  
48 effectively and approach patients at our desired time intervals after tracheal tube  
49 removal. Researchers will ensure that delirium assessments are performed as close to  
50 30 minutes and 60 minutes post-tracheal tube removal as possible. However, due to  
51 logistical considerations such as patient transport and Anesthesia team handoff,  
52 patients may not be available to approach for delirium at either time point.  
53  
54

55  
56 We anticipate that a significant proportion of patients may be unwilling to participate in  
57 the 3D-CAM during their stay in the PACU or ICU. For example, many more patients  
58 may elect to complete a single 3D-CAM at 30 minutes post-tracheal tube removal rather  
59  
60



1  
2  
3 than at both time points. Patient responses to the 3D-CAM administered at the 2<sup>nd</sup> time  
4 point may also be influenced by their 3D-CAM at 30 minutes after tracheal tube  
5 removal; i.e. they may experience survey fatigue. It is also possible that participation in  
6 this study may impact a patient's willingness to continue their enrollment in ENGAGES,  
7 including the completion of the full CAM in the first five postoperative days and other  
8 types of data collected in ENGAGES.  
9  
10

11  
12 It is not ideal to compare incidence of emergence delirium as assessed by 3D-CAM in  
13 the PACU or ICU with delirium incidence assessed by the unabbreviated CAM, CAM-  
14 ICU, or delirium chart review in the postoperative period. While the CAM is a validated  
15 instrument for detection of delirium by non-psychiatrists, it does take much longer to  
16 administer. As it will be advantageous for this study to assess for delirium at two  
17 different time points in a relatively short period, we feel that the advantages of using the  
18 3D-CAM outweigh the possible losses in sensitivity and specificity that will result from  
19 departure from the full CAM.  
20  
21

#### 22 f. Compliance 23 24

25 As this is an observational study, no procedures for monitoring exposure compliance  
26 are necessary. Patients may be withdrawn from this study, as well as SATISFY-SOS, or  
27 ENGAGES if requested. As described in the consent forms for SATISFY-SOS and  
28 ENGAGES, data already collected may continue to be used.  
29  
30

### 31 V. Ethical considerations 32 33

34 We have considered the burden imposed on patients having to undergo two successive  
35 3D-CAM assessments in the first hour after tracheal tube removal. As the 3D-CAM is  
36 very limited in duration, usually requiring patient participation for 3 minutes (9), we  
37 believe the selection of this assessment method is acceptable. We do not believe that  
38 participation in the 3D-CAM up to 2 times during PACU or ICU stay will have any  
39 negative effects on patient care or postoperative outcomes.  
40  
41

42 This study has received institutional IRB approval at Washington University School of  
43 Medicine IRB ID#201612007 on December 8, 2016.  
44  
45

#### 46 a. Finance and insurance 47 48

49 This study involves little-to-no risk to patients, and patients will not be compensated for  
50 participation. There are no relevant finance details, insurance details, or covers for  
51 negligent and non-negligent harm in this study.  
52  
53

#### 54 b. Reporting and dissemination 55 56

57 Results of this study will be presented at national meetings and published in a scientific  
58 journal. Participants will not be individually notified regarding the results of this study.  
59  
60

## VI. References

1. Editors TPM. Observational Studies: Getting Clear about Transparency. *PLOS Med.* 2014 Aug 26;11(8):e1001711.
2. Fong TG, Tulebaev SR, Inouye SK. Delirium in elderly adults: diagnosis, prevention and treatment. *Nat Rev Neurol.* 2009 Apr;5(4):210–20.
3. Aldrete JA, Kroulik D. A postanesthetic recovery score. *Anesth Analg.* 1970 Dec;49(6):924–34.
4. Fritz BA, Rao P, Mashour GA, Abdallah A ben, Burnside BA, Jacobsohn E, et al. Postoperative Recovery with Bispectral Index versus Anesthetic Concentration–guided Protocols: *Anesthesiology.* 2013 May;118(5):1113–22.
5. Munk L, Andersen G, Møller AM. Post-anaesthetic emergence delirium in adults: incidence, predictors and consequences. *Acta Anaesthesiol Scand.* 2016 Mar 1;n/a-n/a.
6. Card E, Pandharipande P, Tomes C, Lee C, Wood J, Nelson D, et al. Emergence from general anaesthesia and evolution of delirium signs in the post-anaesthesia care unit. *Br J Anaesth.* 2015 Sep 1;115(3):411–7.
7. Radtke FM, Franck M, MacGuill M, Seeling M, Lütz A, Westhoff S, et al. Duration of fluid fasting and choice of analgesic are modifiable factors for early postoperative delirium. *Eur J Anaesthesiol.* 2010 May;27(5):411–6.
8. Neufeld KJ, Leoutsakos J-MS, Sieber FE, Wanamaker BL, Gibson Chambers JJ, Rao V, et al. Outcomes of Early Delirium Diagnosis After General Anesthesia in the Elderly. *Anesth Analg.* 2013 Aug;117(2):471–8.
9. Sharma PT, Sieber FE, Zakriya KJ, Pauldine RW, Gerold KB, Hang J, et al. Recovery Room Delirium Predicts Postoperative Delirium After Hip-Fracture Repair: *Anesth Analg.* 2005 Oct;101(4):1215–20.
10. Sessler CN, Gosnell MS, Grap MJ, Brophy GM, O’Neal PV, Keane KA, et al. The Richmond Agitation–Sedation Scale. *Am J Respir Crit Care Med.* 2002 Nov 15;166(10):1338–44.
11. Marcantonio ER, Ngo LH, O’Connor M, Jones RN, Crane PK, Metzger ED, et al. 3D-CAM: Derivation and Validation of a 3-Minute Diagnostic Interview for CAM-Defined DeliriumA Cross-sectional Diagnostic Test Study3D-CAM: Derivation and Validation of a 3-Minute Interview for Delirium. *Ann Intern Med.* 2014 Oct 21;161(8):554–61.
12. Ely EWM, Margolin R, Francis JM, May LR, Truman BR, Dittus RM, et al. Evaluation of delirium in critically ill patients: Validation of the Confusion Assessment Method for the Intensive Care Unit (CAM-ICU). *Crit Care Med.* 2001 Jul;29(7):1370–9.
13. Inouye SK, van Dyck CH, Alessi CA, Balkin S, Siegal AP, Horwitz RI. Clarifying Confusion: The Confusion Assessment MethodA New Method for Detection of Delirium. *Ann Intern Med.* 1990 Dec 15;113(12):941–8.
14. Kuczmarska A, Ngo LH, Guess J, O’Connor MA, Branford-White L, Palihnich K, et al. Detection of Delirium in Hospitalized Older General Medicine Patients: A Comparison of the 3D-CAM and CAM-ICU. *J Gen Intern Med.* 2015 Oct 6;31(3):297–303.
15. Barr J, Pandharipande PP. The Pain, Agitation, and Delirium Care Bundle: Synergistic Benefits of Implementing the 2013 Pain, Agitation, and Delirium Guidelines in an Integrated and Interdisciplinary Fashion. *Crit Care Med.* 2013 Sep;41:S99–115.

- 1  
2  
3  
4  
5  
6  
7  
8  
9  
10  
11  
12  
13  
14  
15  
16  
17  
18  
19  
20  
21  
22  
23  
24  
25  
26  
27  
28  
29  
30  
31  
32  
33  
34  
35  
36  
37  
38
16. Fritz BA, Kalarickal PL, Maybrier HR, Muench MR, Dearth D, Chen Y, et al. Intraoperative Electroencephalogram Suppression Predicts Postoperative Delirium: *Anesth Analg*. 2016 Jan;122(1):234–42.
  17. Whitlock EL, Torres BA, Lin N, Helsten DL, Nadelson MR, Mashour GA, et al. Postoperative delirium in a substudy of cardiothoracic surgical patients in the BAG-RECALL clinical trial. *Anesth Analg*. 2014 Apr;118(4):809–17.
  18. Vittinghoff E, McCulloch CE. Relaxing the Rule of Ten Events per Variable in Logistic and Cox Regression. *Am J Epidemiol*. 2007 Mar 15;165(6):710–8.
  19. SBT-PACKET.pdf [Internet]. [cited 2016 May 19]. Available from: <http://alzheimer.wustl.edu/adrc2/Images/SBT-PACKET.pdf>
  20. Blessed G, Tomlinson BE, Roth M. The Association Between Quantitative Measures of Dementia and of Senile Change in the Cerebral Grey Matter of Elderly Subjects. *Br J Psychiatry*. 1968 Jul 1;114(512):797–811.
  21. Hall WH, Ramachandran R, Narayan S, Jani AB, Vijayakumar S. An electronic application for rapidly calculating Charlson comorbidity score. *BMC Cancer*. 2004 Dec 20;4:94.
  22. Charlson M, Szatrowski TP, Peterson J, Gold J. Validation of a combined comorbidity index. *J Clin Epidemiol*. 1994 Nov 1;47(11):1245–51.
  23. Inouye SK. Delirium in Older Persons. *N Engl J Med*. 2006 Mar 16;354(11):1157–65.
  24. Petersen Tym MK, Ludbrook GL, Flabouris A, Seglenieks R, Painter TW. Developing models to predict early postoperative patient deterioration and adverse events: Modelling perioperative decisions. *ANZ J Surg* [Internet]. 2017 Jan [cited 2017 Apr 21]; Available from: <http://doi.wiley.com/10.1111/ans.13874>
  25. Methods Guide for Effectiveness and Comparative Effectiveness Reviews - Overview | AHRQ Effective Health Care Program [Internet]. *Effective Health Care*. 2014 [cited 2016 May 19]. Available from: <http://effectivehealthcare.ahrq.gov/index.cfm/search-for-guides-reviews-and-reports/?pageaction=displayproduct&productid=318>

### 39 VII. Author contributions

40  
41 VC and CMT contributed equally to study conceptualization, statistical design, protocol  
42 drafting, and protocol editing.

43  
44 VLK contributed to statistical design.

45  
46 SLM completed the institutional IRB approval process.

47  
48 MSA contributed to study conceptualization and protocol editing.

### 49 VIII. Collaborators

50  
51 The authors thank Jamila Burton, Daniel Emmert, Thomas Graetz, Shelly Gupta, Tony  
52 Lee, Hannah Maybrier, Angela Mickle, Maxwell Muench, Jordan Oberhaus, Ben  
53 Palanca, Aamil Patel, James Spencer, Chloe Stallion, Tracey Stevens, Brian Torres,  
54 Emma Trammel, Ravi Upadhyayula, and Troy Wildes.

## IX. Funding information

This work was supported by NIA Grants 1UH2AG050312-01 and 5UH3AG050312-03 as a sub-study of ENGAGES. SATISFY-SOS was supported by BJH Foundation grant BJHF#7937-77. Victoria Cui was supported by NIH Training Grant 2T35HL007815-21.

## X. Data Sharing

Data collection for this study is ongoing.

## XI. Competing interests

The authors report no conflicts of interest in conducting this study.

## Appendix A

### a. ENGAGES Inclusion and Exclusion Criteria

#### Inclusion:

1. Adults older than 60;
2. competent to provide informed consent;
3. undergoing major elective surgery requiring a minimum stay of 2 days postoperatively (e.g., major open cardiac, thoracic, vascular, intra-abdominal, gynecologic, urologic, orthopedic, hepato-biliary and ear, nose and throat surgery);
4. enrolled in the SATISFY-SOS study

#### Exclusion:

1. Unable to provide informed consent;
2. undergoing neurosurgical procedures;
3. preoperative delirium;
4. unable to participate adequately in delirium screening including those who are blind, deaf, illiterate or not fluent in English;
5. history of intraoperative awareness;
6. additional surgery planned within five days of index surgery

### b. SATISFY-SOS Inclusion and Exclusion Criteria

#### Inclusion:

1. Surgical and procedural patients who require anesthesia services

#### Exclusion:

1. Patients under the age of 18 years

STROBE Statement—Checklist of items that should be included in reports of *cross-sectional studies*

Title: **Protocol for an observational study of delirium in the Post-Anesthesia Care Unit (PACU) as a potential predictor of subsequent postoperative delirium**

|                              | Item No | Recommendation                                                                                                                                                                                                                                                                                                                                                              |
|------------------------------|---------|-----------------------------------------------------------------------------------------------------------------------------------------------------------------------------------------------------------------------------------------------------------------------------------------------------------------------------------------------------------------------------|
| <b>Title and abstract</b>    | 1       | (a) Indicate the study's design with a commonly used term in the title or the abstract<br><b>Complete (Page 1)</b><br>(b) Provide in the abstract an informative and balanced summary of what was done and what was found <b>Complete (Page 4)</b>                                                                                                                          |
| <b>Introduction</b>          |         |                                                                                                                                                                                                                                                                                                                                                                             |
| Background/rationale         | 2       | Explain the scientific background and rationale for the investigation being reported<br><b>Complete (Pages 5-8)</b>                                                                                                                                                                                                                                                         |
| Objectives                   | 3       | State specific objectives, including any prespecified hypotheses<br><b>Complete (Page 7)</b>                                                                                                                                                                                                                                                                                |
| <b>Methods</b>               |         |                                                                                                                                                                                                                                                                                                                                                                             |
| Study design                 | 4       | Present key elements of study design early in the paper<br><b>Complete (Pages 8-12)</b>                                                                                                                                                                                                                                                                                     |
| Setting                      | 5       | Describe the setting, locations, and relevant dates, including periods of recruitment, exposure, follow-up, and data collection<br><b>Complete (Pages 8-12)</b>                                                                                                                                                                                                             |
| Participants                 | 6       | (a) Give the eligibility criteria, and the sources and methods of selection of participants<br><b>Complete (Page 9)</b>                                                                                                                                                                                                                                                     |
| Variables                    | 7       | Clearly define all outcomes, exposures, predictors, potential confounders, and effect modifiers. Give diagnostic criteria, if applicable<br><b>Complete (Pages 10-12)</b>                                                                                                                                                                                                   |
| Data sources/<br>measurement | 8*      | For each variable of interest, give sources of data and details of methods of assessment (measurement). Describe comparability of assessment methods if there is more than one group<br><b>Complete (Pages 10-12)</b>                                                                                                                                                       |
| Bias                         | 9       | Describe any efforts to address potential sources of bias<br><b>Complete (Page 9, 11)</b>                                                                                                                                                                                                                                                                                   |
| Study size                   | 10      | Explain how the study size was arrived at<br><b>Complete (Page 11-12)</b>                                                                                                                                                                                                                                                                                                   |
| Quantitative variables       | 11      | Explain how quantitative variables were handled in the analyses. If applicable, describe which groupings were chosen and why<br><b>Complete (Pages 10-12)</b>                                                                                                                                                                                                               |
| Statistical methods          | 12      | <b>Complete (Pages 10-12)</b><br>(a) Describe all statistical methods, including those used to control for confounding<br>(b) Describe any methods used to examine subgroups and interactions<br>(c) Explain how missing data were addressed<br>(d) If applicable, describe analytical methods taking account of sampling strategy<br>(e) Describe any sensitivity analyses |
| <b>Results</b>               |         |                                                                                                                                                                                                                                                                                                                                                                             |
| Participants                 | 13*     | (a) Report numbers of individuals at each stage of study—eg numbers potentially eligible, examined for eligibility, confirmed eligible, included in the study, completing follow-up, and analysed <b>Complete (Pages 8-11)</b>                                                                                                                                              |

|                          |     |                                                                                                                                                                                                                                                                                                                                                                                                                                                 |
|--------------------------|-----|-------------------------------------------------------------------------------------------------------------------------------------------------------------------------------------------------------------------------------------------------------------------------------------------------------------------------------------------------------------------------------------------------------------------------------------------------|
|                          |     | (b) Give reasons for non-participation at each stage <b>Complete (Pages 8-11)</b>                                                                                                                                                                                                                                                                                                                                                               |
|                          |     | (c) Consider use of a flow diagram <b>Complete (Pages 8-11)</b>                                                                                                                                                                                                                                                                                                                                                                                 |
| Descriptive data         | 14* | (a) Give characteristics of study participants (eg demographic, clinical, social) and information on exposures and potential confounders <b>Complete (Pages 8-13)</b><br>(b) Indicate number of participants with missing data for each variable of interest<br><b>Data collection ongoing</b>                                                                                                                                                  |
| Outcome data             | 15* | Report numbers of outcome events or summary measures<br><b>Data collection ongoing</b>                                                                                                                                                                                                                                                                                                                                                          |
| Main results             | 16  | <b>Data collection ongoing</b><br>(a) Give unadjusted estimates and, if applicable, confounder-adjusted estimates and their precision (eg, 95% confidence interval). Make clear which confounders were adjusted for and why they were included<br>(b) Report category boundaries when continuous variables were categorized<br>(c) If relevant, consider translating estimates of relative risk into absolute risk for a meaningful time period |
| Other analyses           | 17  | Report other analyses done—eg analyses of subgroups and interactions, and sensitivity analyses<br><b>Data collection ongoing</b>                                                                                                                                                                                                                                                                                                                |
| <b>Discussion</b>        |     | <b>Data collection ongoing</b>                                                                                                                                                                                                                                                                                                                                                                                                                  |
| Key results              | 18  | Summarise key results with reference to study objectives                                                                                                                                                                                                                                                                                                                                                                                        |
| Limitations              | 19  | Discuss limitations of the study, taking into account sources of potential bias or imprecision. Discuss both direction and magnitude of any potential bias                                                                                                                                                                                                                                                                                      |
| Interpretation           | 20  | Give a cautious overall interpretation of results considering objectives, limitations, multiplicity of analyses, results from similar studies, and other relevant evidence                                                                                                                                                                                                                                                                      |
| Generalisability         | 21  | Discuss the generalisability (external validity) of the study results                                                                                                                                                                                                                                                                                                                                                                           |
| <b>Other information</b> |     |                                                                                                                                                                                                                                                                                                                                                                                                                                                 |
| Funding                  | 22  | Give the source of funding and the role of the funders for the present study and, if applicable, for the original study on which the present article is based<br><b>Complete (Page 16)</b>                                                                                                                                                                                                                                                      |

\*Give information separately for exposed and unexposed groups.

**Note:** An Explanation and Elaboration article discusses each checklist item and gives methodological background and published examples of transparent reporting. The STROBE checklist is best used in conjunction with this article (freely available on the Web sites of PLoS Medicine at <http://www.plosmedicine.org/>, Annals of Internal Medicine at <http://www.annals.org/>, and Epidemiology at <http://www.epidem.com/>). Information on the STROBE Initiative is available at [www.strobe-statement.org](http://www.strobe-statement.org).
