# Supplementary material for: Protocol for an observational study of delirium in the post-anaesthesia care unit (PACU) as a potential predictor of subsequent postoperative delirium
Source: PubMed Central journal article supplement — BMJ Open. 2017 Jul 10;7(7):e016402. doi: 10.1136/bmjopen-2017-016402 (PMC5541504; doi:10.1136/bmjopen-2017-016402), 2017-07-10
Supplement: bmjopen-2017-016402supp001.pdf [file bmjopen-2017-016402supp001.pdf]

## Appendix A

### a. ENGAGES Inclusion and Exclusion Criteria

#### Inclusion:

1. Adults older than 60;
2. competent to provide informed consent;
3. undergoing major elective surgery requiring a minimum stay of 2 days postoperatively (e.g., major open cardiac, thoracic, vascular, intra-abdominal, gynecologic, urologic, orthopedic, hepato-biliary and ear, nose and throat surgery);
4. enrolled in the SATISFY-SOS study

#### Exclusion:

1. Unable to provide informed consent;
2. undergoing neurosurgical procedures;
3. preoperative delirium;
4. unable to participate adequately in delirium screening including those who are blind, deaf, illiterate or not fluent in English;
5. history of intraoperative awareness;
6. additional surgery planned within five days of index surgery

### b. SATISFY-SOS Inclusion and Exclusion Criteria

#### Inclusion:

1. Surgical and procedural patients who require anesthesia services

#### Exclusion:

1. Patients under the age of 18 years
